# Supplementary material for: Superoxide Dismutase 1 Folding Stability as a Target for Molecular Tweezers in SOD1‐Related Amyotrophic Lateral Sclerosis
Source: PubMed Central journal article supplement — Chembiochem. 2022 Sep 29;23(21):e202200396. doi: 10.1002/cbic.202200396 (PMC9828543; doi:10.1002/cbic.202200396), 2022-09-29
Supplement: CBIC-23-0-s001.pdf [file CBIC-23-0-s001.pdf]

# ChemBioChem

Supporting Information

## **Superoxide Dismutase 1 Folding Stability as a Target for Molecular Tweezers in SOD1-Related Amyotrophic Lateral Sclerosis**

Nirnay Samanta<sup>+</sup>, Yasser B. Ruiz-Blanco<sup>+</sup>, Zamira Fetahaj, David Gnuttt, Carter Lantz, Joseph A. Loo, Elsa Sanchez-Garcia,\* and Simon Ebbinghaus\*

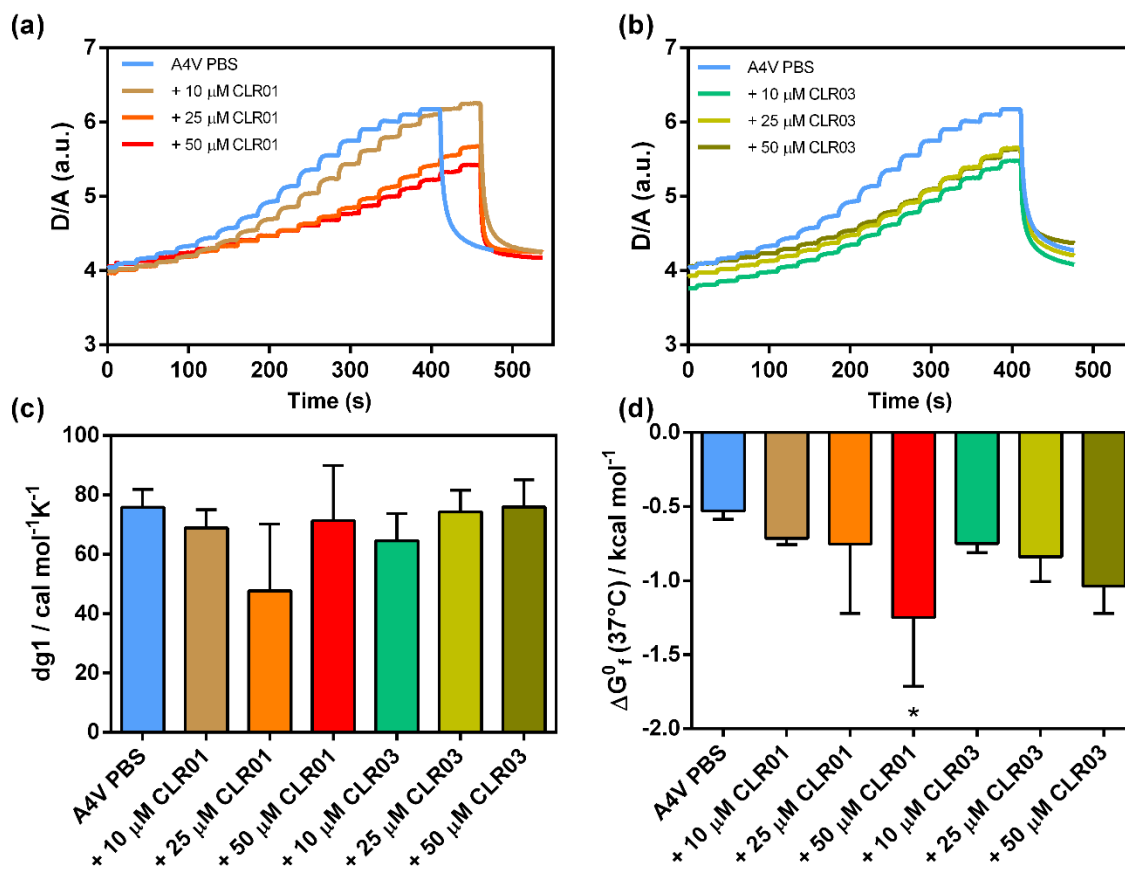

**Figure S1:** Exemplary D/A plots of FReI measurements of SOD1<sup>bar</sup> A4V in the presence of different concentrations of (a) CLR01 and (b) CLR03. Evaluation of respective (c) cooperativity parameters (dg1) and (d) standard free energy change of folding ( $\Delta G^0_f$ ) at 37 °C in presence of CLR01/03. Data is shown as mean and s.d.. Using one-way ANOVA with post-hoc analysis, significant statistical differences with respect to the PBS measurement were determined, which are indicated by asterisks (\* $p < 0.05$ , \*\* $p < 0.01$ , \*\*\*\* $p < 0.0001$ ).  $n = 5$ .

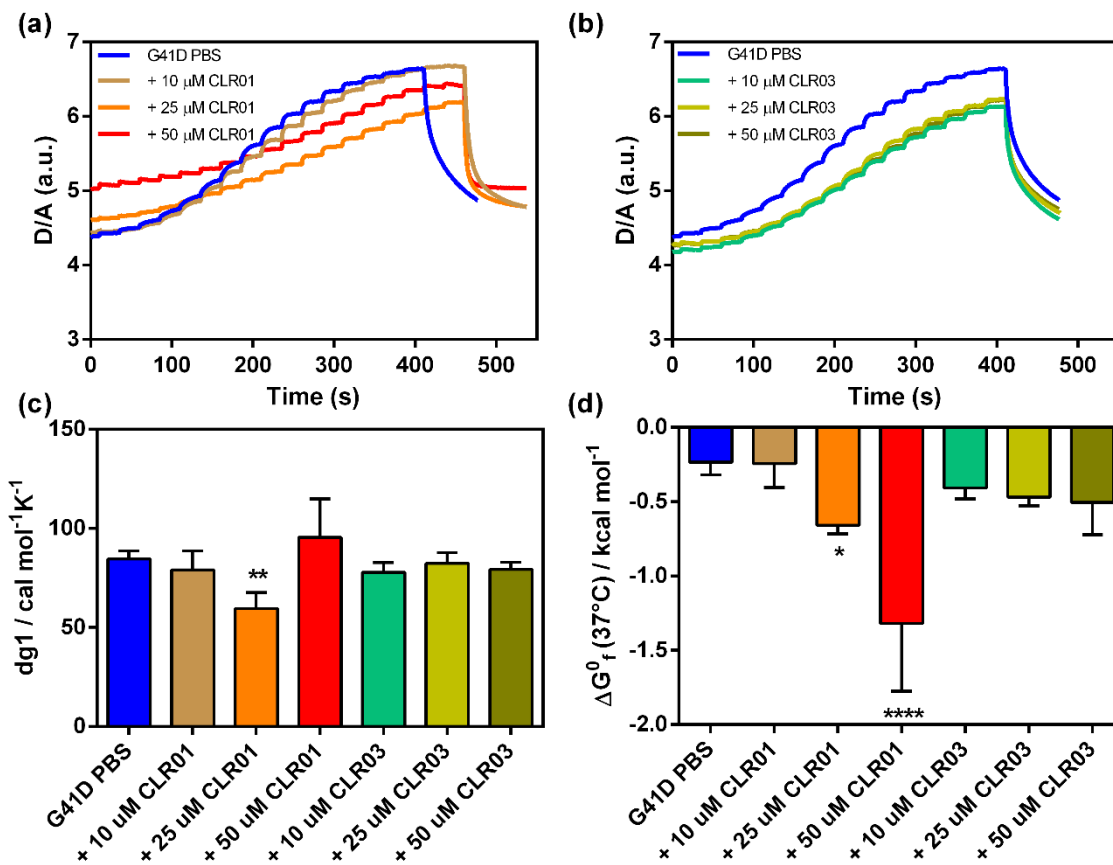

**Figure S2:** Exemplary D/A plot of FReI measurement of SOD1<sub>bar</sub>G41D in the presence of different concentration of (a) CLR01 and (b) CLR03. Evaluation of respective (c) cooperativity parameters (dg1) and (d) standard free energy change of folding ( $\Delta G^0_f$ ) at 37 °C in presence of CLR01/03. Data is shown as mean and s.d.. Using one-way ANOVA with post-hoc analysis, significant statistical differences with respect to the PBS measurement were determined, which are indicated by asterisks (\* $p < 0.05$ , \*\* $p < 0.01$ , \*\*\*\* $p < 0.0001$ ).  $n = 5$ .

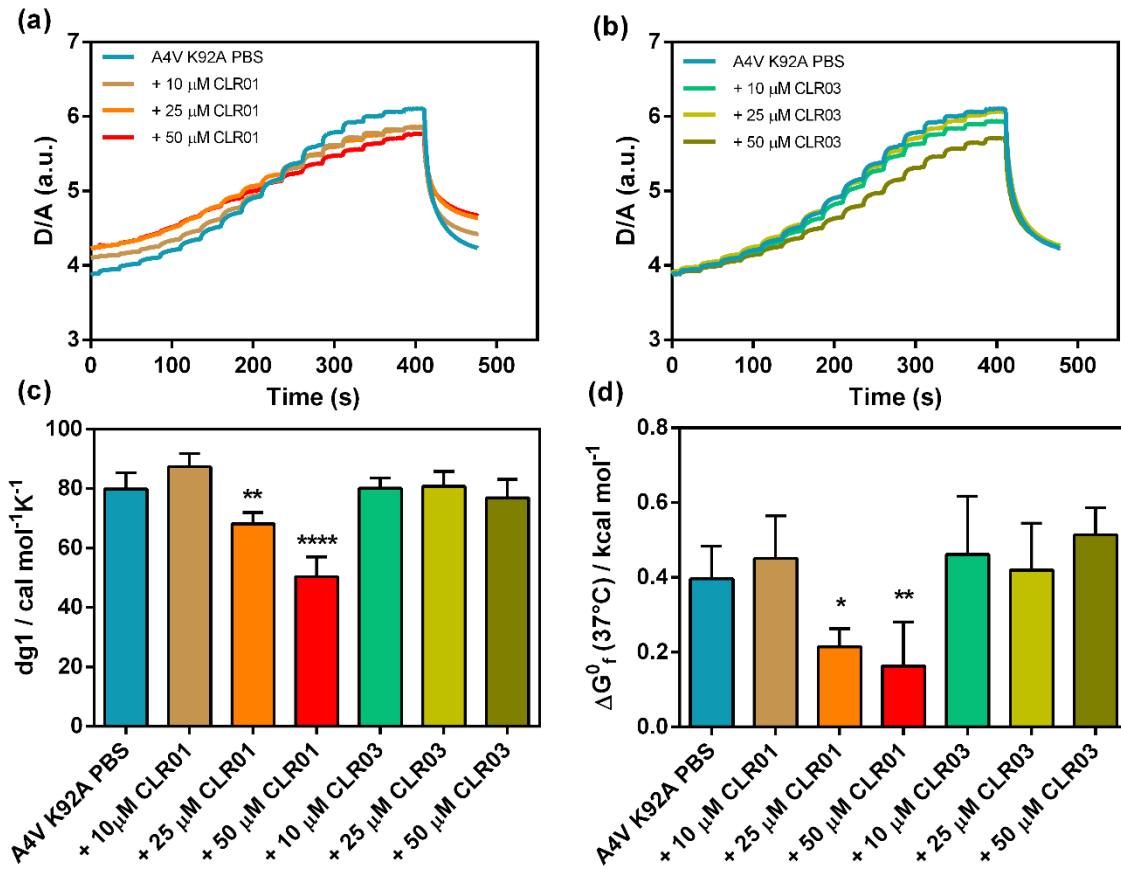

**Figure S3:** Exemplary D/A plot of FReI measurement of SOD1<sub>bar</sub>A4V K92A in presence of different concentration of (a) CLR01 and (b) CLR03. (c) cooperativity parameter (dg1) and (d) standard free energy change of folding ( $\Delta G^0_f$ ) at 37 °C in presence of CLR01/03. The mean value and its corresponding standard deviation are shown. Using one-way ANOVA with post-hoc analysis, significant statistical differences with respect to the PBS measurement were determined, which are indicated by asterisks (\* $p < 0.05$ , \*\* $p < 0.01$ , \*\*\*\* $p < 0.0001$ ).  $n = 5$ .

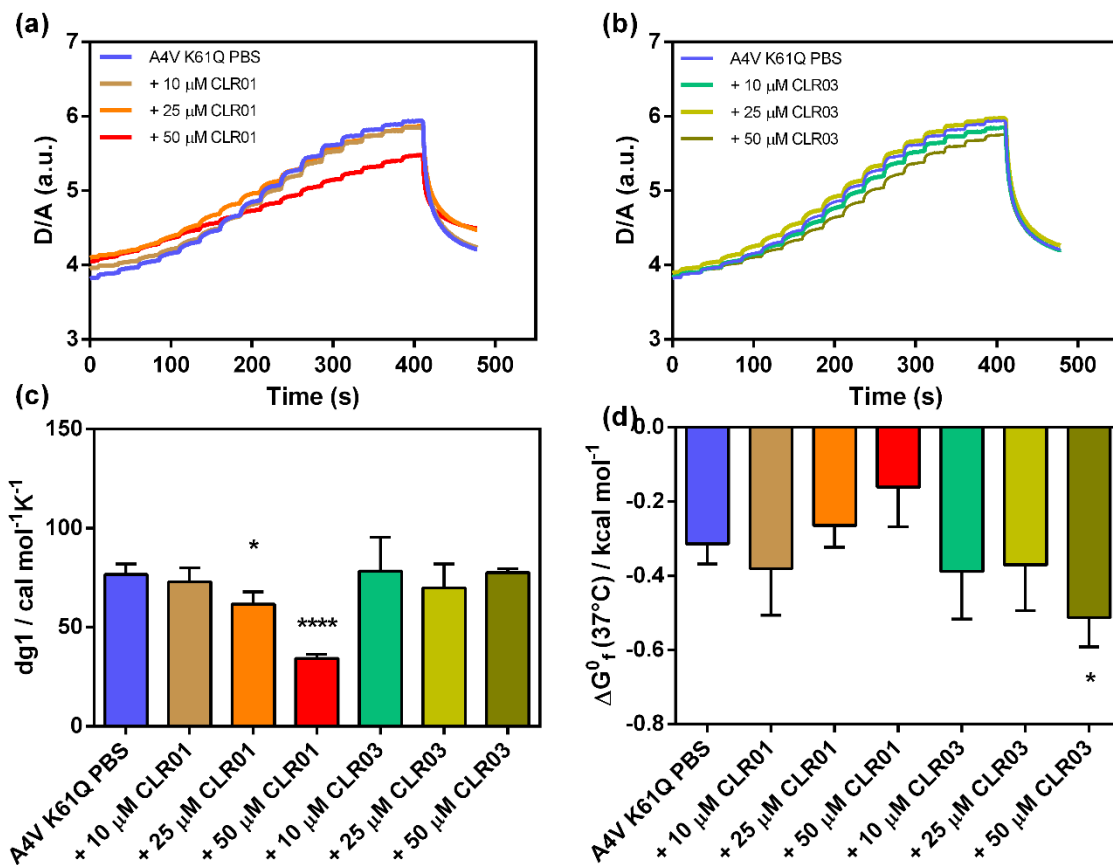

**Figure S4:** Exemplary D/A plot of FReI measurement of SOD1<sub>bar</sub>A4V K61Q in presence of different concentration of (a) CLR01 and (b) CLR03. (c) cooperativity parameter (dg1) and (d) standard free energy change of folding ( $\Delta G^0_f$ ) at 37 °C in presence of CLR01/03. The mean value and its corresponding standard deviation are shown. Using one-way ANOVA with post-hoc analysis, significant statistical differences with respect to the PBS measurement were determined, which are indicated by asterisks (\* $p < 0.05$ , \*\* $p < 0.01$ , \*\*\*\* $p < 0.0001$ ).  $n = 5$ .

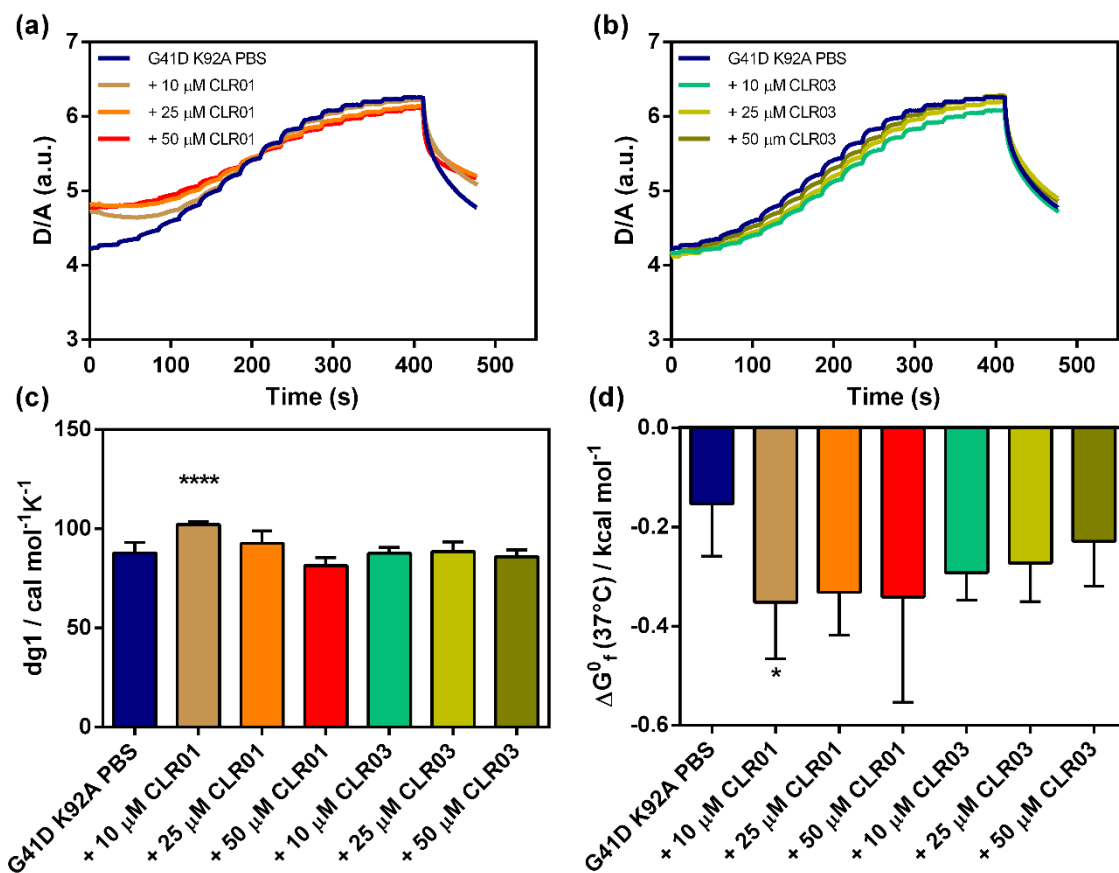

**Figure S5:** Exemplary D/A plot of FReI measurement of SOD1<sup>bar</sup>G41D K92A in presence of different concentration of (a) CLR01 and (b) CLR03. (c) cooperativity parameter (dg1) and (d) standard free energy change of folding ( $\Delta G_f^0$ ) at 37 °C in presence of CLR01/03. The mean value and its corresponding standard deviation are shown. Using one-way ANOVA with post-hoc analysis, significant statistical differences with respect to the PBS measurement were determined, which are indicated by asterisks (\* $p < 0.05$ , \*\* $p < 0.01$ , \*\*\*\* $p < 0.0001$ ).  $n = 5$ .

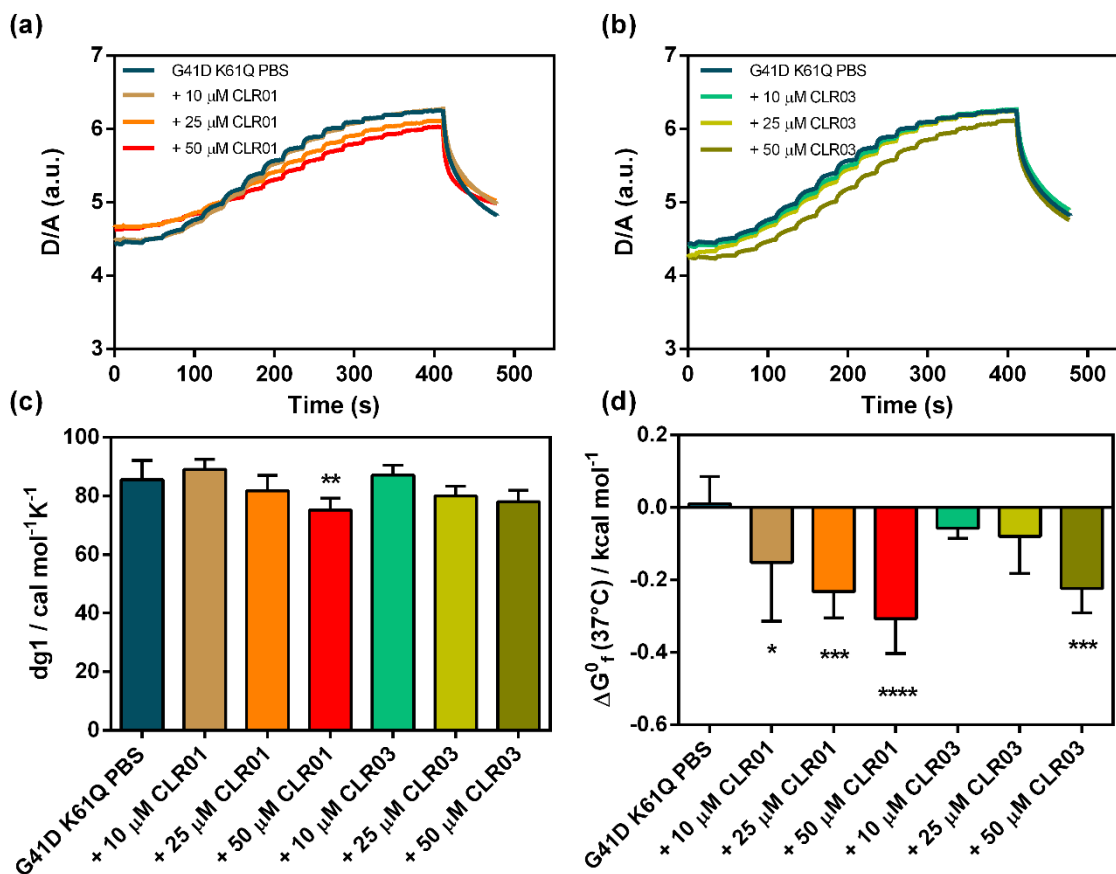

**Figure S6:** Exemplary D/A plot of FRel measurement of SOD1<sub>bar</sub>G41D K61Q in presence of different concentration of (a) CLR01 and (b) CLR03. (c) cooperativity parameter (dg1) and (d) standard free energy change of folding ( $\Delta G^0_f$ ) at 37 °C in presence of CLR01/03. The mean value and its corresponding standard deviation are shown. Using one-way ANOVA with post-hoc analysis, significant statistical differences with respect to the PBS measurement were determined, which are indicated by asterisks (\* $p < 0.05$ , \*\* $p < 0.01$ , \*\*\*\* $p < 0.0001$ ).  $n = 5$ .

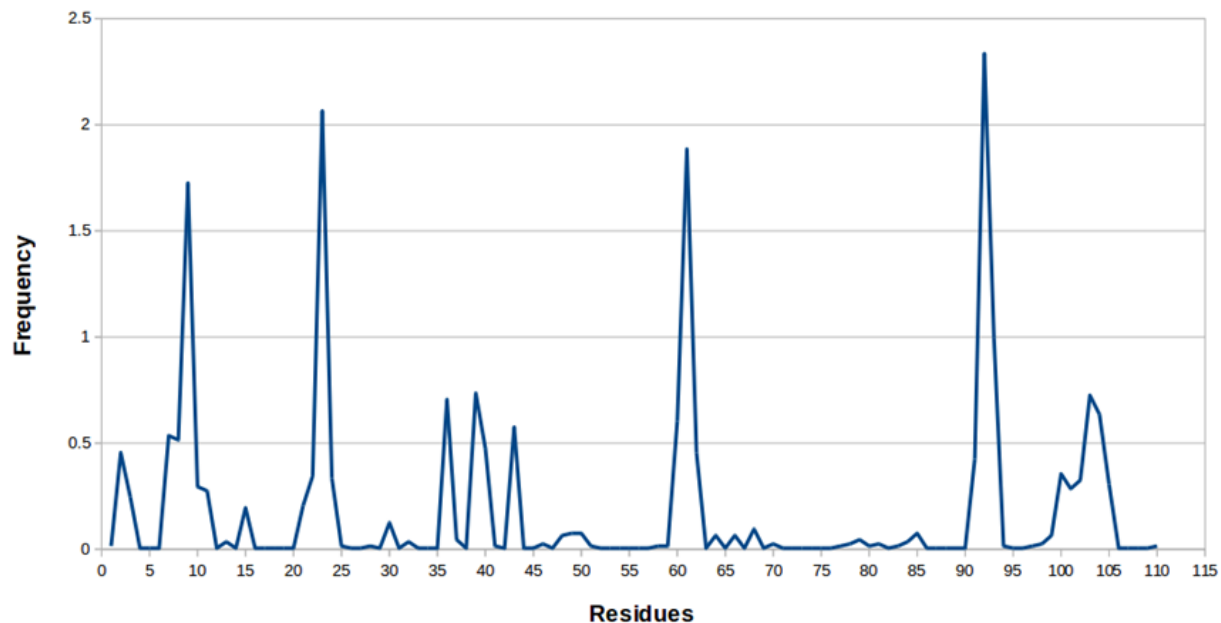

**Figure S7:** Prevalence of tweezers in the vicinity of each residue of SOD1. The vicinity was defined as 4 Å distance between the phosphorous atoms of the tweezers and any heavy atom of the amino acid. The frequency values correspond to the average number of CLR01's phosphorous atoms within the vicinity of every residue along the simulations. NOTE: frequency values larger than two indicate that a second molecule of CLR01 is close (< 4 Å) to the corresponding residue during part of the simulation. The four peaks with frequencies above 1.5 correspond to K9, K23, K61 and K92.



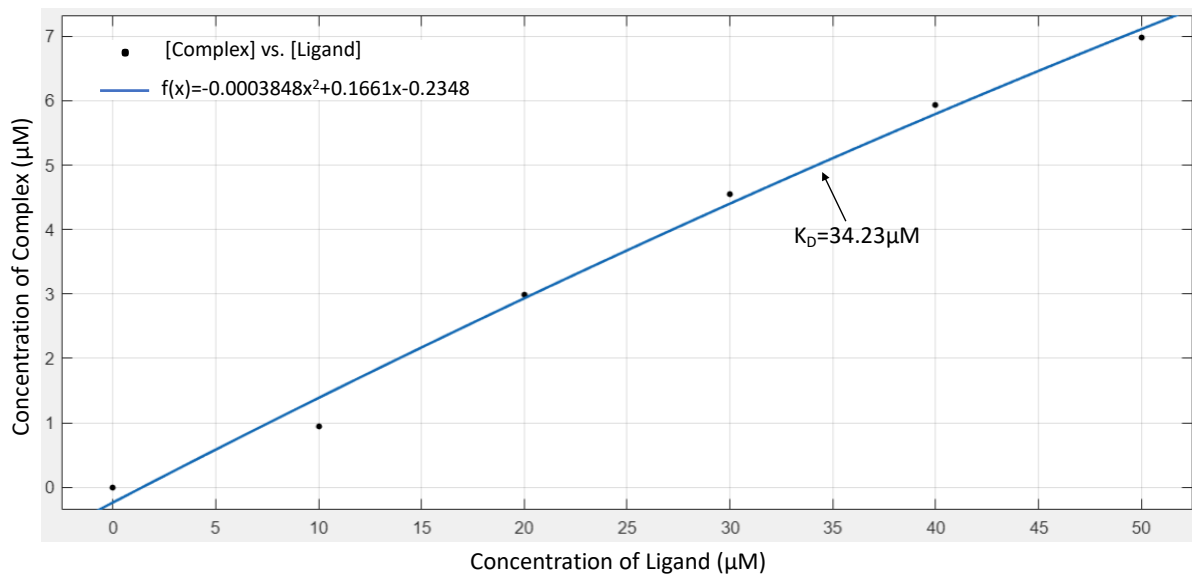

**Figure S8:** The curve utilized to calculate a  $K_D$  value for CLR01 binding to SOD1<sub>bar</sub>. The concentration of SOD1<sub>bar</sub> bound to CLR01 was plotted against the concentration of total ligand. A quadratic function was fitted to the data points and the  $K_D$  was calculated to be the concentration of ligand at which 50% of SOD1<sub>bar</sub> is bound (5 $\mu\text{M}$ ).

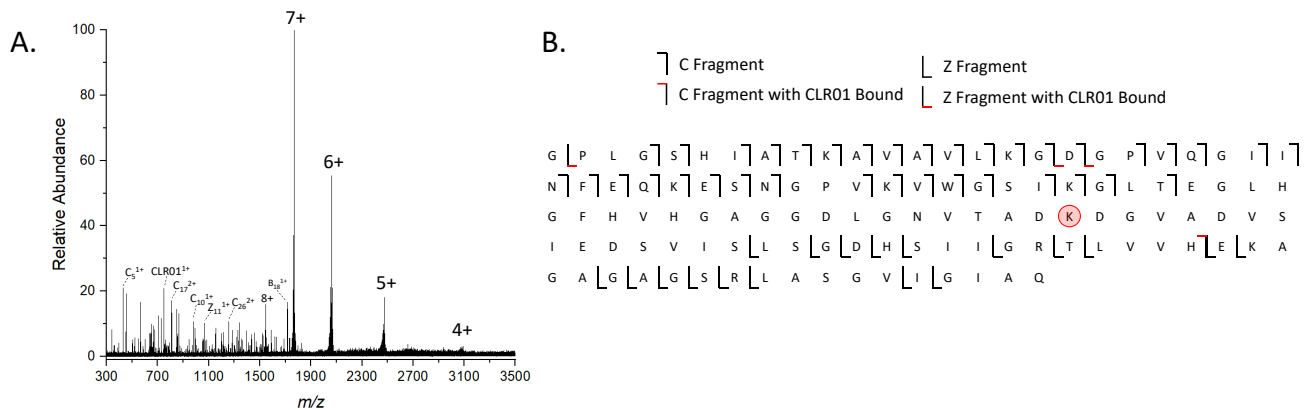

**Figure S9:** (A) An ECD fragmentation spectrum of the SOD1<sub>bar</sub>/CLR01 complex, and (B) a representation of the peaks present in the TD mass spectrum. Analysis of the MS fragmentation revealed that CLR01 binds SOD1<sub>bar</sub> on K61 (as highlighted by red circle)

**Table S1: Thermodynamic parameters as obtained from FReI data analysis:** Melting temperature ( $T_m$ ), cooperativity parameter ( $dgI$ ) and modified standard free energy change of folding ( $\Delta G_f^0$ ) at 37 °C for SOD1<sub>bar</sub>A4V, SOD1<sub>bar</sub>G41D and the double mutants in PBS and in presence of CLR01/03.

|                                    | $T_m$ (K)   | $dgI \pm s.d.$ (kcal mol <sup>-1</sup> K <sup>-1</sup> ) | $\Delta G_f^0 \pm s.d.$ (at 310 K)<br>(kcal mol <sup>-1</sup> ) |
|------------------------------------|-------------|----------------------------------------------------------|-----------------------------------------------------------------|
| <b>SOD1<sub>bar</sub>A4V</b>       |             |                                                          |                                                                 |
| <b>PBS</b>                         | 316.98±0.53 | 0.076±0.005                                              | -0.53±0.06                                                      |
| <b>CLR01 10μM</b>                  | 320.38±0.57 | 0.069±0.007                                              | -0.71±0.04                                                      |
| <b>CLR01 25 μM</b>                 | 325.23±3.33 | 0.048±0.022                                              | -0.75±0.47                                                      |
| <b>CLR01 50 μM</b>                 | 327.08±2.47 | 0.072±0.019                                              | -1.25±0.47                                                      |
| <b>CLR03 10 μM</b>                 | 321.75±1.52 | 0.065±0.010                                              | -0.75±0.06                                                      |
| <b>CLR03 25 μM</b>                 | 321.25±1.49 | 0.074±0.007                                              | -0.84±0.16                                                      |
| <b>CLR03 50 μM</b>                 | 323.63±1.52 | 0.076±0.010                                              | -1.04±0.18                                                      |
| <b>SOD1<sub>bar</sub>G41D</b>      |             |                                                          |                                                                 |
| <b>PBS</b>                         | 312.81±1.13 | 0.084±0.005                                              | -0.23±0.08                                                      |
| <b>CLR01 10μM</b>                  | 313.25±2.27 | 0.079±0.010                                              | -0.24±0.16                                                      |
| <b>CLR01 25 μM</b>                 | 321.28±2.19 | 0.060±0.007                                              | -0.66±0.06                                                      |
| <b>CLR01 50 μM</b>                 | 323.58±1.88 | 0.096±0.019                                              | -1.32±0.46                                                      |
| <b>CLR03 10 μM</b>                 | 315.25±0.98 | 0.079±0.005                                              | -0.41±0.07                                                      |
| <b>CLR03 25 μM</b>                 | 315.73±0.88 | 0.081±0.005                                              | -0.47±0.06                                                      |
| <b>CLR03 50 μM</b>                 | 316.45±3.09 | 0.079±0.005                                              | -0.50±0.22                                                      |
| <b>SOD1<sub>bar</sub>A4V K92A</b>  |             |                                                          |                                                                 |
| <b>PBS</b>                         | 312.81±1.13 | 0.079±0.005                                              | 0.40±0.09                                                       |
| <b>CLR01 10μM</b>                  | 313.25±2.27 | 0.088±0.005                                              | 0.45±0.11                                                       |
| <b>CLR01 25 μM</b>                 | 321.28±2.19 | 0.069±0.005                                              | 0.22±0.05                                                       |
| <b>CLR01 50 μM</b>                 | 323.58±1.88 | 0.050±0.007                                              | 0.16±0.12                                                       |
| <b>CLR03 10 μM</b>                 | 315.25±0.98 | 0.081±0.002                                              | 0.46±0.16                                                       |
| <b>CLR03 25 μM</b>                 | 315.73±0.88 | 0.081±0.005                                              | 0.42±0.13                                                       |
| <b>CLR03 50 μM</b>                 | 316.45±3.09 | 0.076±0.007                                              | 0.51±0.07                                                       |
| <b>SOD1<sub>bar</sub>A4V K61Q</b>  |             |                                                          |                                                                 |
| <b>PBS</b>                         | 314.11±0.76 | 0.076±0.005                                              | -0.32±0.05                                                      |
| <b>CLR01 10μM</b>                  | 315.17±1.45 | 0.074±0.007                                              | -0.38±0.12                                                      |
| <b>CLR01 25 μM</b>                 | 314.31±0.84 | 0.062±0.007                                              | -0.27±0.06                                                      |
| <b>CLR01 50 μM</b>                 | 314.85±3.50 | 0.033±0.002                                              | -0.16±0.11                                                      |
| <b>CLR03 10 μM</b>                 | 315.39±2.61 | 0.079±0.017                                              | -0.39±0.13                                                      |
| <b>CLR03 25 μM</b>                 | 315.33±1.49 | 0.069±0.012                                              | -0.37±0.12                                                      |
| <b>CLR03 50 μM</b>                 | 316.63±1.12 | 0.076±0.002                                              | -0.51±0.08                                                      |
| <b>SOD1<sub>bar</sub>G41D K92A</b> |             |                                                          |                                                                 |
| <b>PBS</b>                         | 311.79±1.29 | 0.88±0.005                                               | -0.15±0.11                                                      |
| <b>CLR01 10μM</b>                  | 313.45±1.13 | 0.103±0.002                                              | -0.35±0.11                                                      |

|                                    |             |             |            |
|------------------------------------|-------------|-------------|------------|
| <i>CLR01 25 μM</i>                 | 313.55±0.71 | 0.093±0.007 | -0.33±0.09 |
| <i>CLR01 50 μM</i>                 | 314.11±2.33 | 0.081±0.005 | -0.34±0.21 |
| <i>CLR03 10 μM</i>                 | 313.33±0.64 | 0.088±0.002 | -0.29±0.05 |
| <i>CLR03 25 μM</i>                 | 313.13±1.05 | 0.088±0.005 | -0.27±0.08 |
| <i>CLR03 50 μM</i>                 | 312.69±1.14 | 0.086±0.002 | -0.23±0.09 |
| <b>SOD1<sub>bar</sub>G41D K61Q</b> |             |             |            |
| <i>PBS</i>                         | 309.88±0.89 | 0.086±0.007 | 0.01±0.07  |
| <i>CLR01 10μM</i>                  | 311.73±1.90 | 0.088±0.002 | -0.15±0.16 |
| <i>CLR01 25 μM</i>                 | 312.89±1.07 | 0.081±0.005 | -0.23±0.07 |
| <i>CLR01 50 μM</i>                 | 314.05±1.13 | 0.074±0.005 | -0.31±0.10 |
| <i>CLR03 10 μM</i>                 | 310.67±0.33 | 0.086±0.002 | -0.06±0.03 |
| <i>CLR03 25 μM</i>                 | 311.03±1.27 | 0.079±0.002 | -0.08±0.10 |
| <i>CLR03 50 μM</i>                 | 312.85±0.81 | 0.079±0.005 | -0.22±0.07 |

**Table S2.** Convergence analysis of the binding free energy calculation with the complex CLR01 – K23. The table summarizes the estimated at every checkpoint of the method, the associated error, the importance sampling ratio (ISR) and the convergence status of the checkpoint. The last row of the table contains the weighted average among the converged checkpoints, the resulting work of the harmonic shape restraints applied to the protein in its bound and unbound states, and the final unbiased estimation recovered by

subtracting the work from the average of the CL-FEP checkpoints. The convergence analysis was performed with an oversampling of 2. All values are in kcal/mol.

| <b>TITLE:</b>               | <b><math>\Delta G</math></b> | <b>ERROR</b> | <b>ISR</b> | <b>CONVERGENCE</b> |
|-----------------------------|------------------------------|--------------|------------|--------------------|
| <b>POINT_0:</b>             | -3.20                        | 0.82         | 13.25      | WARNING3           |
| <b>POINT_1:</b>             | -2.19                        | 0.49         | 14.93      | OK                 |
| <b>POINT_2:</b>             | -1.81                        | 0.56         | 19.50      | OK                 |
| <b>POINT_3:</b>             | -2.15                        | 0.63         | 26.82      | WARNING3           |
| <b>POINT_4:</b>             | -2.66                        | 0.76         | 18.84      | WARNING3           |
| <b>POINT_5:</b>             | -3.18                        | 0.76         | 43.59      | WARNING3           |
| <b>POINT_6:</b>             | -1.84                        | 0.69         | 25.84      | WARNING3           |
| <b>POINT_7:</b>             | 0.91                         | 0.65         | 24.75      | WARNING3           |
| <b>POINT_8:</b>             | -3.24                        | 0.43         | 25.33      | OK                 |
| <b>POINT_9:</b>             | -3.27                        | 0.59         | 24.18      | OK                 |
| <b>POINT_10:</b>            | -2.67                        | 0.59         | 39.35      | WARNING3           |
| <b>POINT_11:</b>            | -2.64                        | 0.49         | 21.34      | OK                 |
| <b>POINT_12:</b>            | -2.17                        | 0.55         | 29.51      | OK                 |
| <b>POINT_13:</b>            | -2.65                        | 0.51         | 32.42      | OK                 |
| <b>POINT_14:</b>            | -2.59                        | 0.53         | 38.03      | OK                 |
| <b>AVERAGE*</b>             | -2.60                        | 0.53         |            |                    |
| <b>WORK OF RESTRAINTS**</b> | 1,56                         | -            |            |                    |
| <b>TOTAL</b>                | -4.16                        | 0.53         |            |                    |

\*ISR-weighted average among converged checkpoints

\*\*Work computed as the difference between the averages of the harmonic restraints in the bound and unbound protein. This value should be subtracted from the results of evaluating CL-FEP to recover an unbiased estimate

**Table S3.** Convergence analysis of the binding free energy calculation with the complex CLR01 – K61. The table summarizes the estimated at every checkpoint of the method, the associated error, the importance sampling ratio (ISR) and the convergence status of the checkpoint. The last row of the table contains the weighted average among the converged checkpoints, the resulting work of the harmonic shape restraints applied to the protein in its bound and unbound states, and the final unbiased estimation recovered by subtracting the work from the average of the CL-FEP checkpoints. The convergence analysis was performed with an oversampling of 2. All values are in kcal/mol.

| <b>TITLE:</b>               | <b><math>\Delta G</math></b> | <b>ERROR</b> | <b>ISR</b> | <b>CONVERGENCE</b> |
|-----------------------------|------------------------------|--------------|------------|--------------------|
| <b>POINT_0:</b>             | -5.09                        | 0.84         | 11.24      | WARNING3           |
| <b>POINT_1:</b>             | 1.80                         | 0.74         | 24.82      | WARNING3           |
| <b>POINT_2:</b>             | -1.87                        | 0.61         | 29.20      | WARNING3           |
| <b>POINT_3:</b>             | -1.10                        | 0.66         | 22.05      | WARNING3           |
| <b>POINT_4:</b>             | 0.14                         | 0.66         | 21.86      | WARNING3           |
| <b>POINT_5:</b>             | -0.88                        | 0.57         | 33.76      | OK                 |
| <b>POINT_6:</b>             | 2.02                         | 0.60         | 34.84      | WARNING3           |
| <b>POINT_7:</b>             | -0.36                        | 0.69         | 31.57      | WARNING3           |
| <b>POINT_8:</b>             | -0.07                        | 0.74         | 37.65      | WARNING3           |
| <b>POINT_9:</b>             | 0.30                         | 0.60         | 25.96      | WARNING3           |
| <b>POINT_10:</b>            | -0.96                        | 0.68         | 87.07      | WARNING3           |
| <b>POINT_11:</b>            | -1.30                        | 0.46         | 37.97      | OK                 |
| <b>POINT_12:</b>            | -1.14                        | 0.57         | 30.45      | OK                 |
| <b>POINT_13:</b>            | -0.86                        | 0.50         | 35.49      | OK                 |
| <b>POINT_14:</b>            | -0.55                        | 0.52         | 26.18      | OK                 |
| <b>AVERAGE*</b>             | -0.97                        | 0.52         |            |                    |
| <b>WORK OF RESTRAINTS**</b> | 0.99                         | -            |            |                    |
| <b>TOTAL</b>                | -1.96                        | 0.52         |            |                    |

\*ISR-weighted average among converged checkpoints

\*\*Work computed as the difference between the averages of the harmonic restraints in the bound and unbound protein. This value should be subtracted from the results of evaluating CL-FEP to recover an unbiased estimate

**Table S4.** Convergence analysis of the binding free energy calculation with the complex CLR01 – K92. The table summarizes the estimated at every checkpoint of the method, the associated error, the importance sampling ratio (ISR) and the convergence status of the checkpoint. The last row of the table contains the weighted average among the converged checkpoints, the resulting work of the harmonic shape restraints applied to the protein in its bound and unbound states, and the final unbiased estimation recovered by subtracting the work from the average of the CL-FEP checkpoints. The convergence analysis was performed with an oversampling of 2. All values are in kcal/mol.

| <b>TITLE:</b>               | <b><math>\Delta G</math></b> | <b>ERROR</b> | <b>ISR</b> | <b>CONVERGENCE</b> |
|-----------------------------|------------------------------|--------------|------------|--------------------|
| <b>POINT_0:</b>             | -2.52                        | 0.92         | 25.12      | WARNING3           |
| <b>POINT_1:</b>             | -1.91                        | 0.67         | 21.12      | WARNING3           |
| <b>POINT_2:</b>             | -0.70                        | 0.74         | 23.01      | WARNING3           |
| <b>POINT_3:</b>             | -4.07                        | 0.59         | 18.12      | OK                 |
| <b>POINT_4:</b>             | -5.08                        | 0.68         | 25.78      | WARNING3           |
| <b>POINT_5:</b>             | -3.90                        | 0.72         | 26.57      | WARNING3           |
| <b>POINT_6:</b>             | -3.48                        | 0.78         | 26.92      | WARNING3           |
| <b>POINT_7:</b>             | -5.61                        | 0.45         | 32.04      | OK                 |
| <b>POINT_8:</b>             | -3.24                        | 0.81         | 29.19      | WARNING3           |
| <b>POINT_9:</b>             | -3.43                        | 0.68         | 32.15      | WARNING3           |
| <b>POINT_10:</b>            | -3.25                        | 0.51         | 33.23      | OK                 |
| <b>POINT_11:</b>            | -4.08                        | 0.44         | 43.25      | OK                 |
| <b>POINT_12:</b>            | -3.58                        | 0.55         | 23.00      | OK                 |
| <b>POINT_13:</b>            | -3.67                        | 0.54         | 45.30      | OK                 |
| <b>POINT_14:</b>            | -3.34                        | 0.49         | 44.33      | OK                 |
| <b>AVERAGE*</b>             | -3.91                        | 0.74         |            |                    |
| <b>WORK OF RESTRAINTS**</b> | -0.1                         | -            |            |                    |
| <b>TOTAL</b>                | -3.81                        | 0.74         |            |                    |

\*ISR-weighted average among converged checkpoints

\*\*Work computed as the difference between the averages of the harmonic restraints in the bound and unbound protein. This value should be subtracted from the results of evaluating CL-FEP to recover an unbiased estimate
